# Supplementary figures and images for: Socrates: identification of genomic rearrangements in tumour genomes by re-aligning soft clipped reads
Source: PubMed Central journal article supplement — Bioinformatics. 2014 Jan 2;30(8):1064–72. doi: 10.1093/bioinformatics/btt767 (PMC3982158; doi:10.1093/bioinformatics/btt767), 2014-01-02

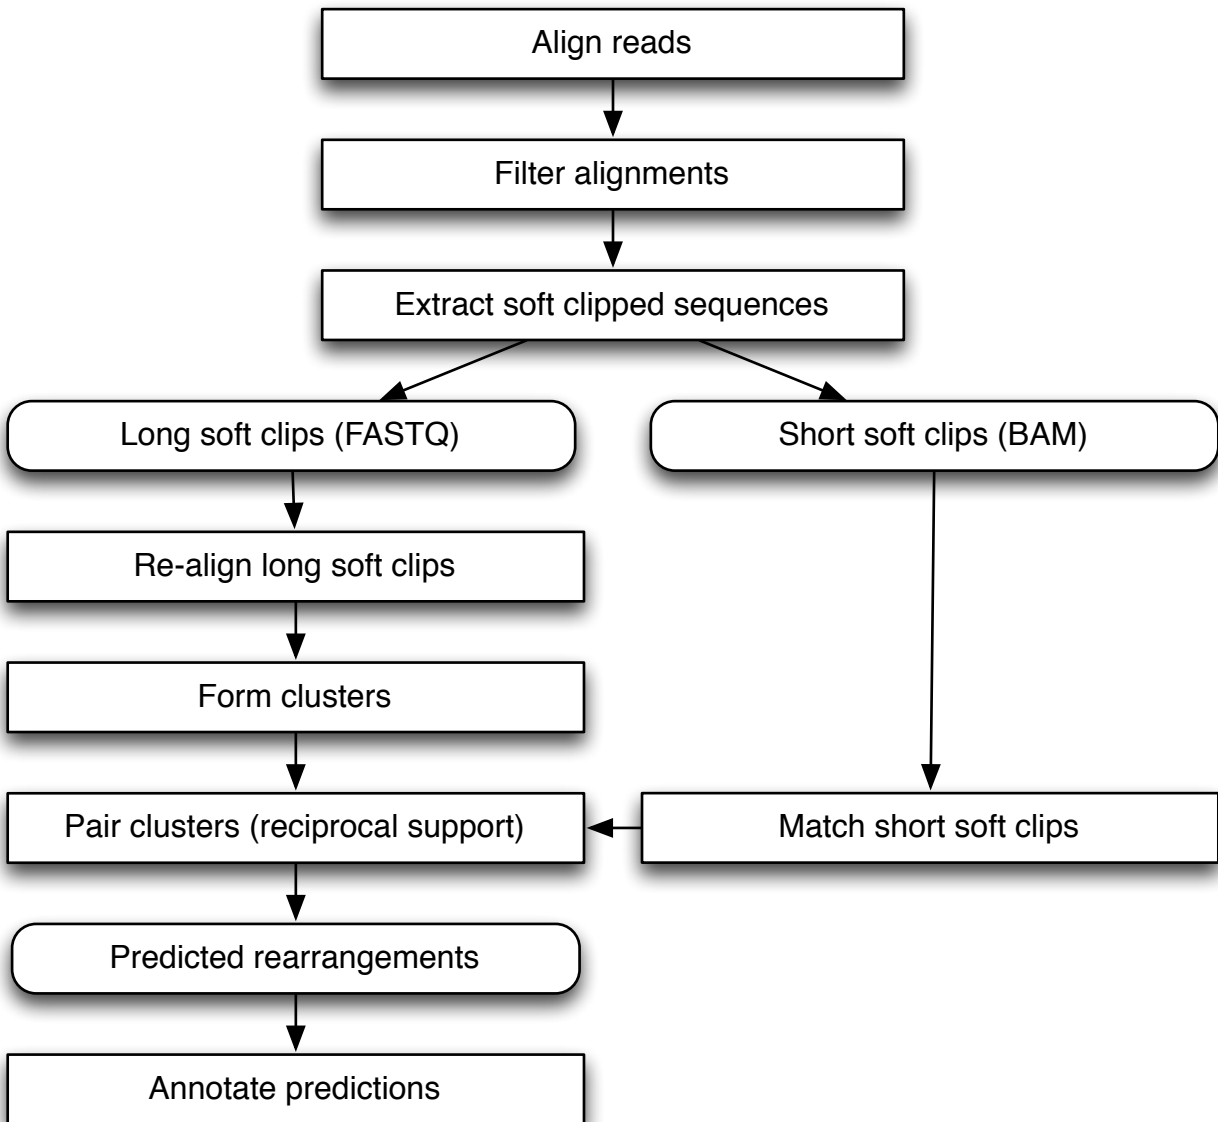

Supplement: supp_btt767_SuppFigure1_Workflow.pdf [file supp_btt767_SuppFigure1_Workflow.pdf]

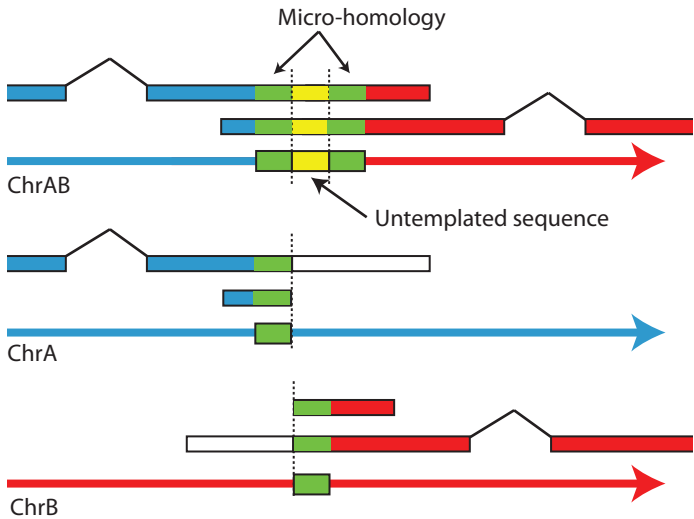

Supplement: supp_btt767_SuppFigure2_Clusters_with_microhomology_and_untemplated.pdf [file supp_btt767_SuppFigure2_Clusters_with_microhomology_and_untemplated.pdf]

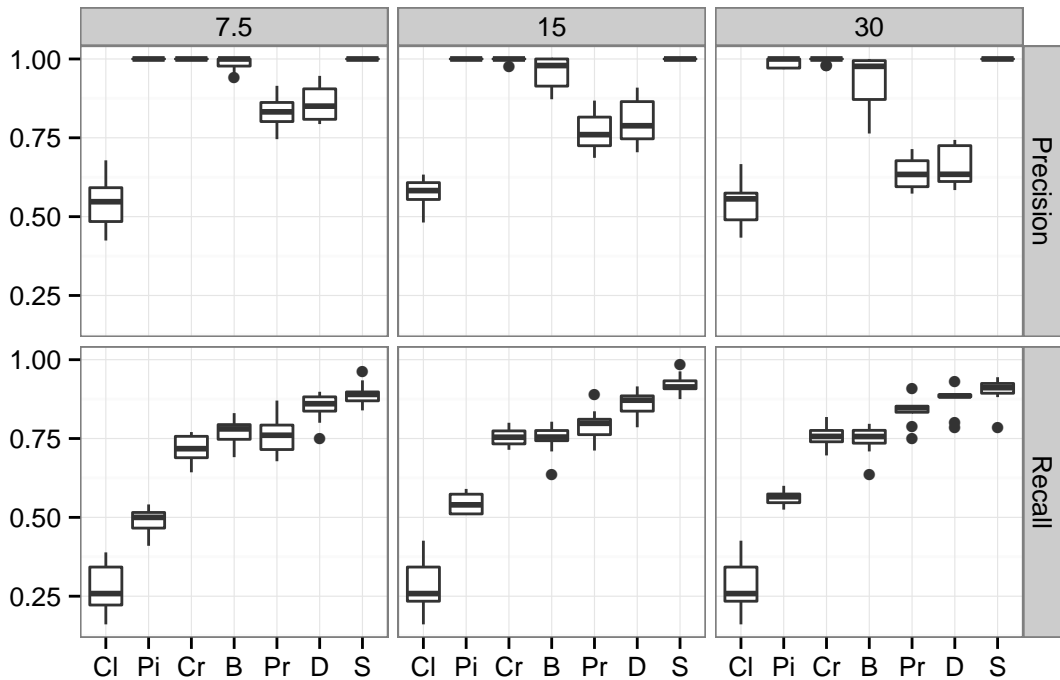

Supplement: supp_btt767_SuppFigure3_precall_ecoli.pdf [file supp_btt767_SuppFigure3_precall_ecoli.pdf]

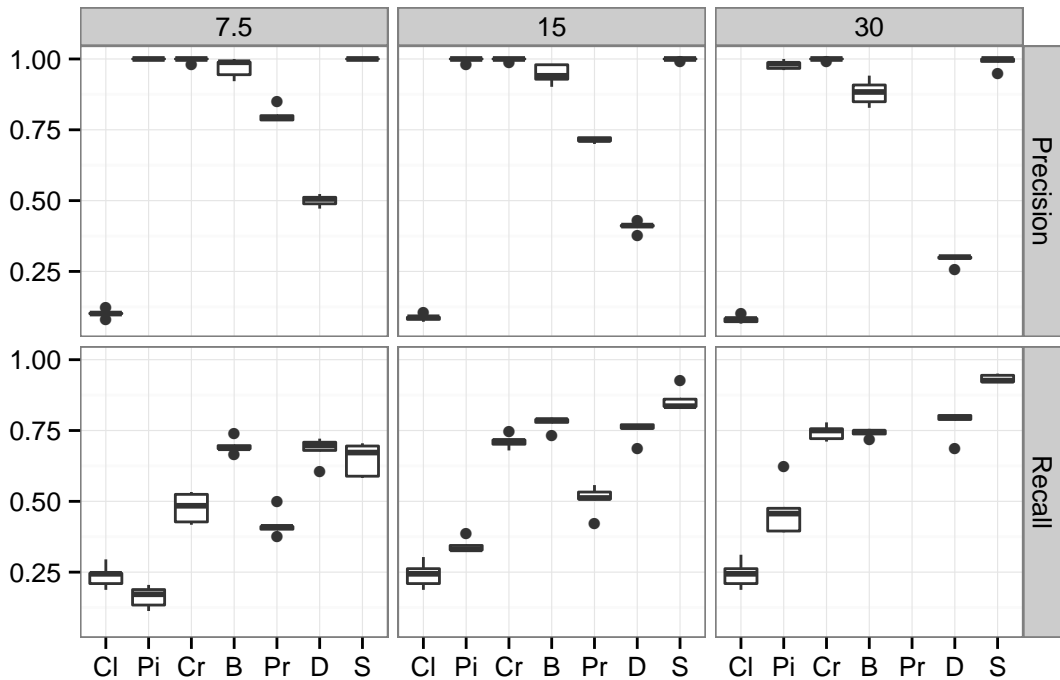

Supplement: supp_btt767_SuppFigure4_precall_chr12.pdf [file supp_btt767_SuppFigure4_precall_chr12.pdf]

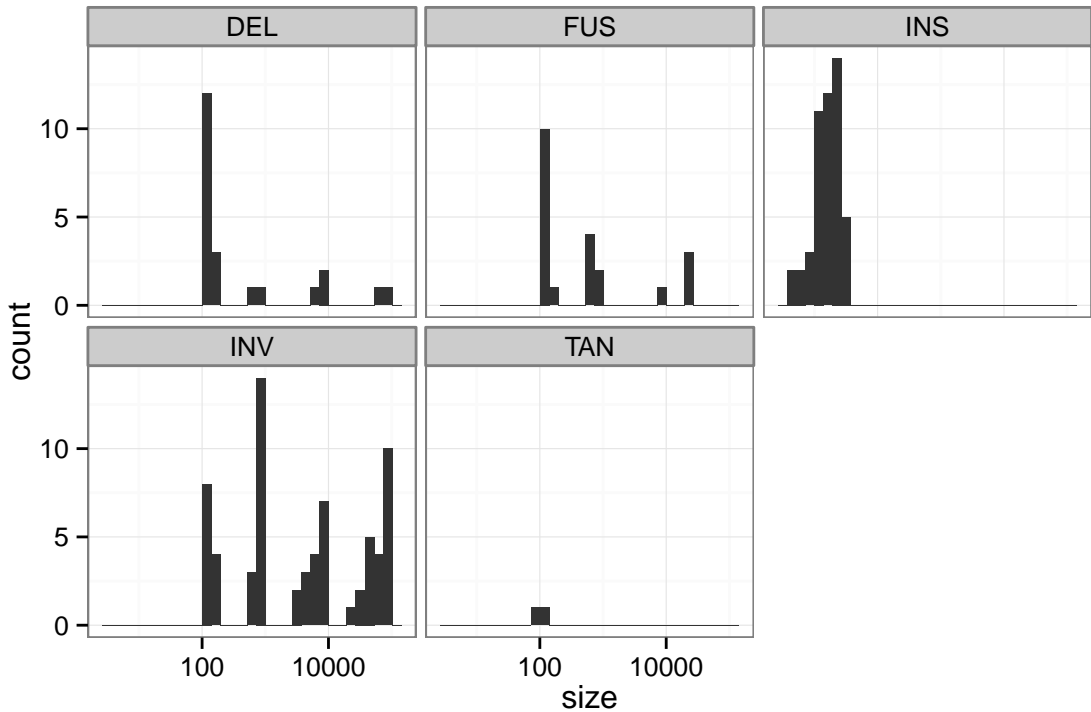

Supplement: supp_btt767_SuppFigure5_fns_bd.pdf [file supp_btt767_SuppFigure5_fns_bd.pdf]

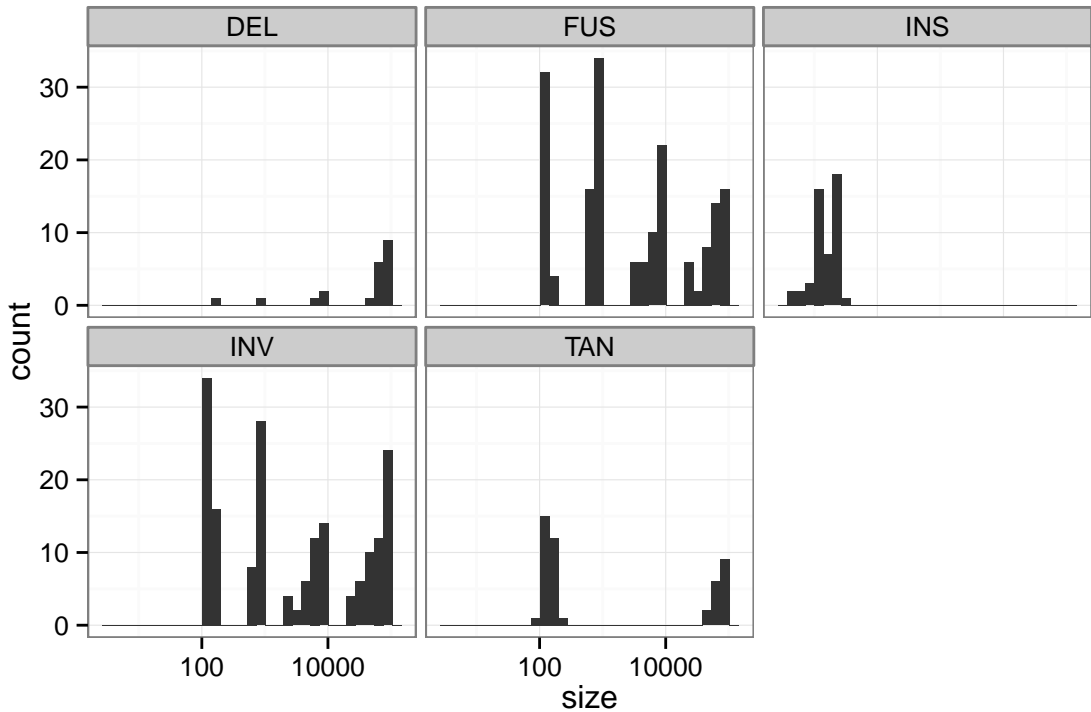

Supplement: supp_btt767_SuppFigure5_fns_clever.pdf [file supp_btt767_SuppFigure5_fns_clever.pdf]

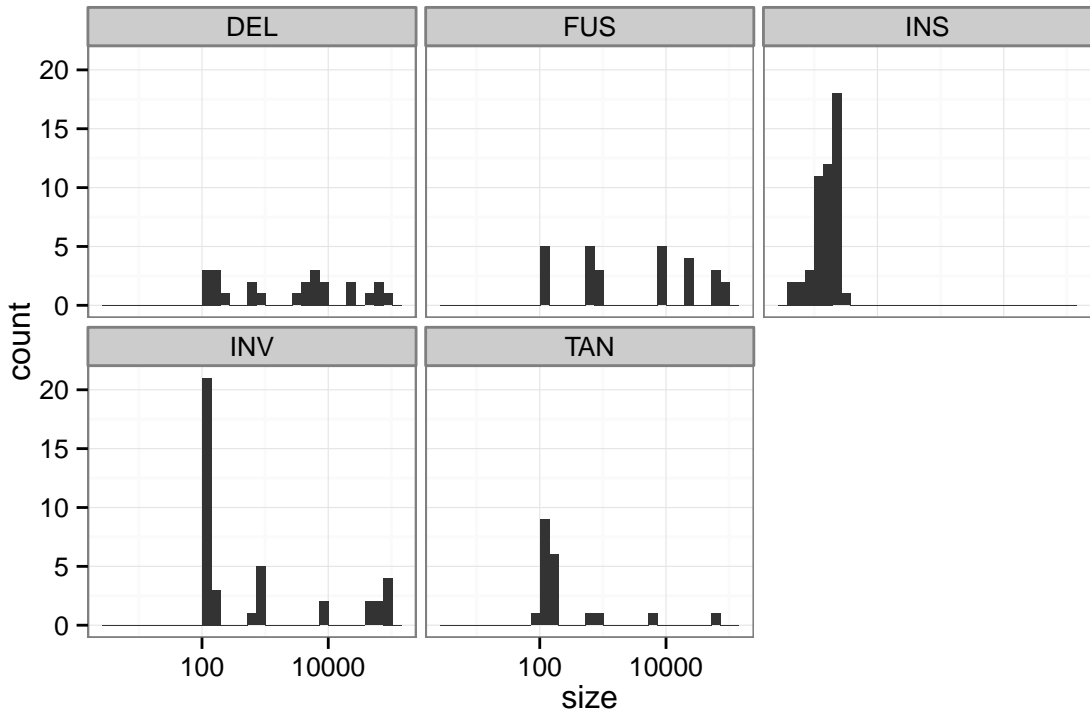

Supplement: supp_btt767_SuppFigure6_fns_crest.pdf [file supp_btt767_SuppFigure6_fns_crest.pdf]

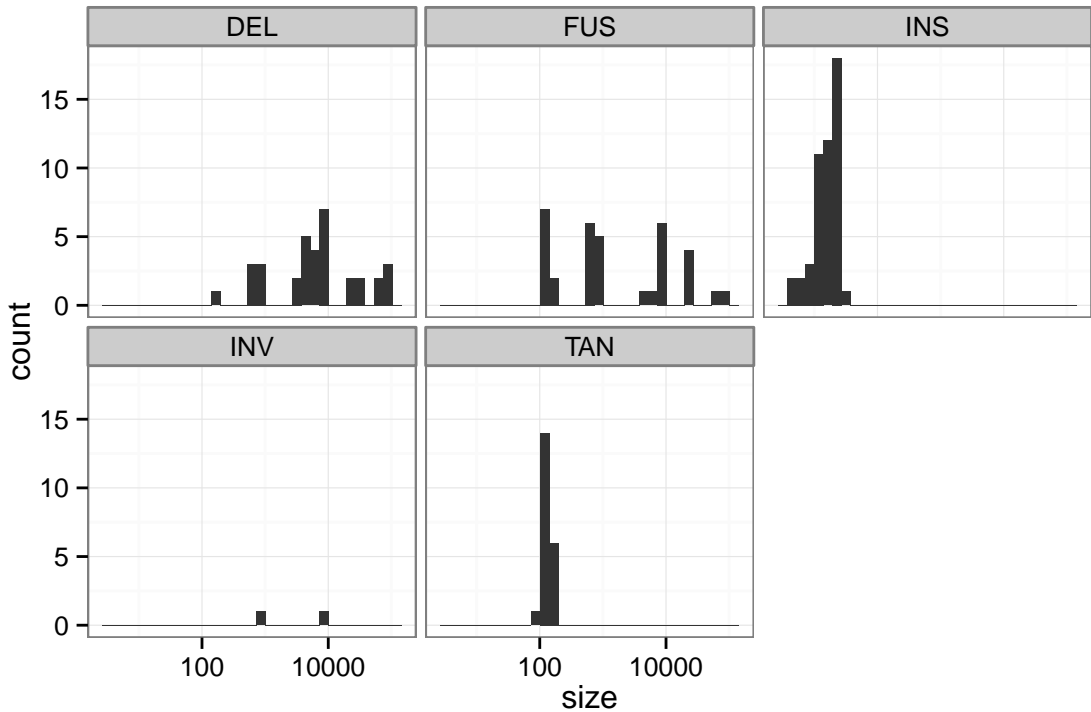

Supplement: supp_btt767_SuppFigure6_fns_delly.pdf [file supp_btt767_SuppFigure6_fns_delly.pdf]

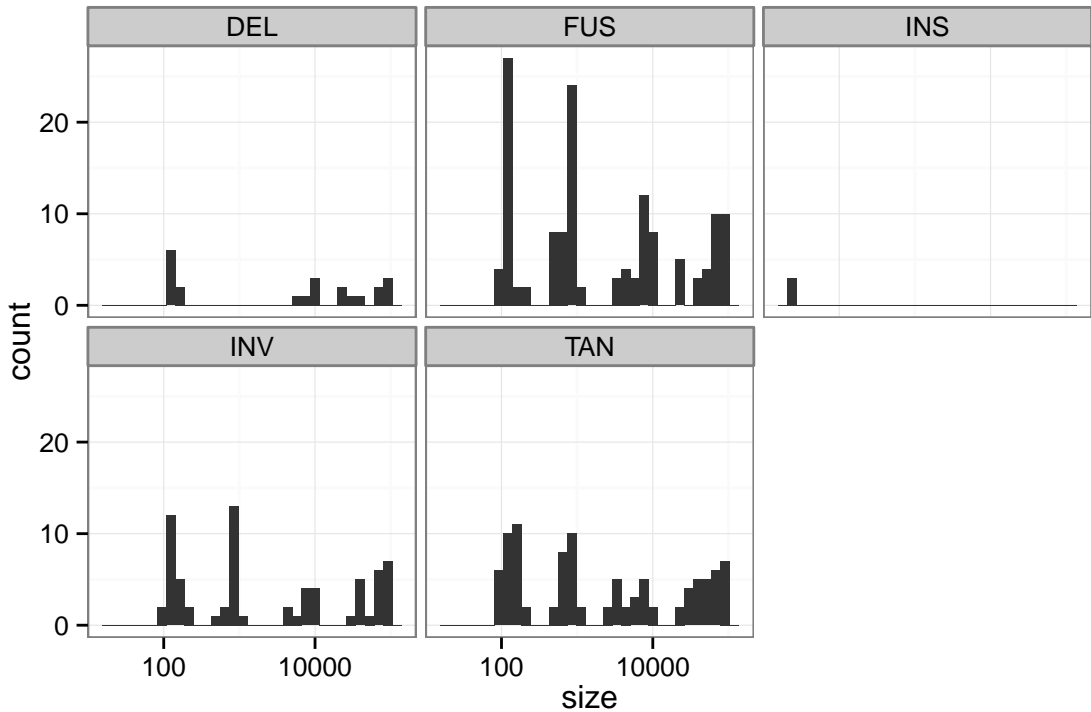

Supplement: supp_btt767_SuppFigure7_fns_pindel.pdf [file supp_btt767_SuppFigure7_fns_pindel.pdf]

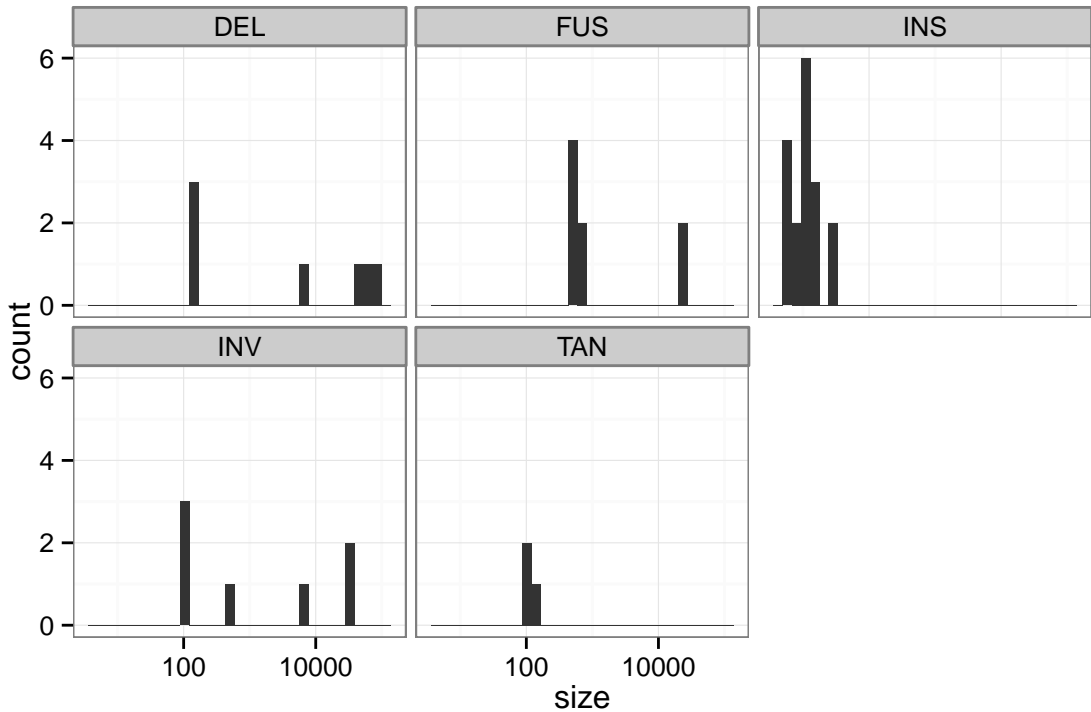

Supplement: supp_btt767_SuppFigure7_fns_socrates.pdf [file supp_btt767_SuppFigure7_fns_socrates.pdf]

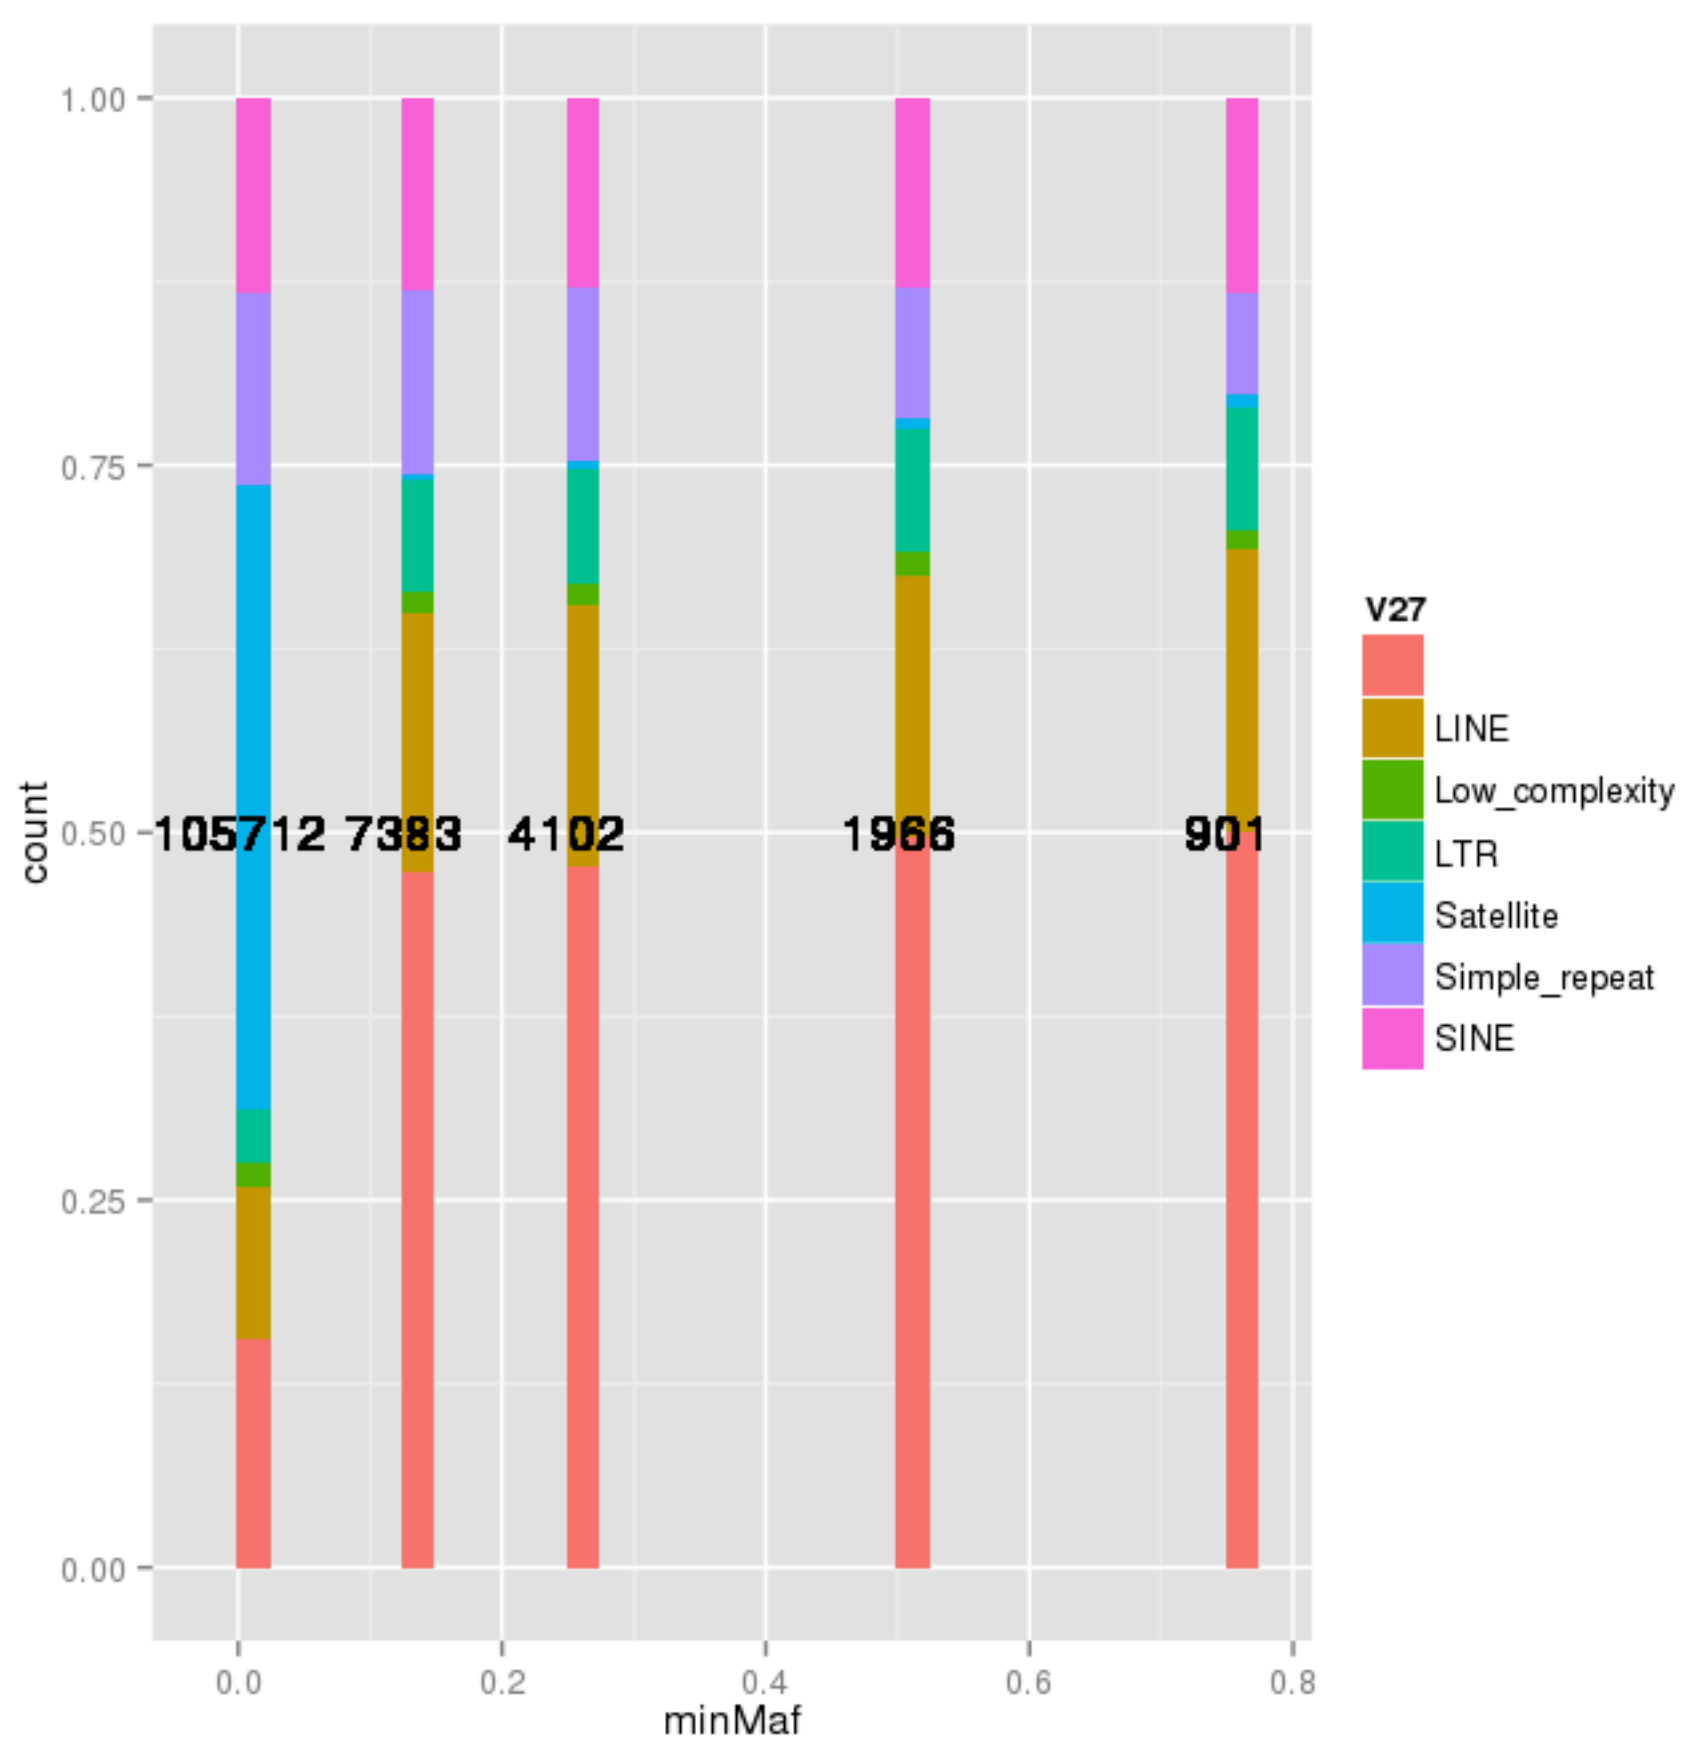

Supplement: supp_btt767_SuppFigure8_maf.pdf [file supp_btt767_SuppFigure8_maf.pdf]

**(A)**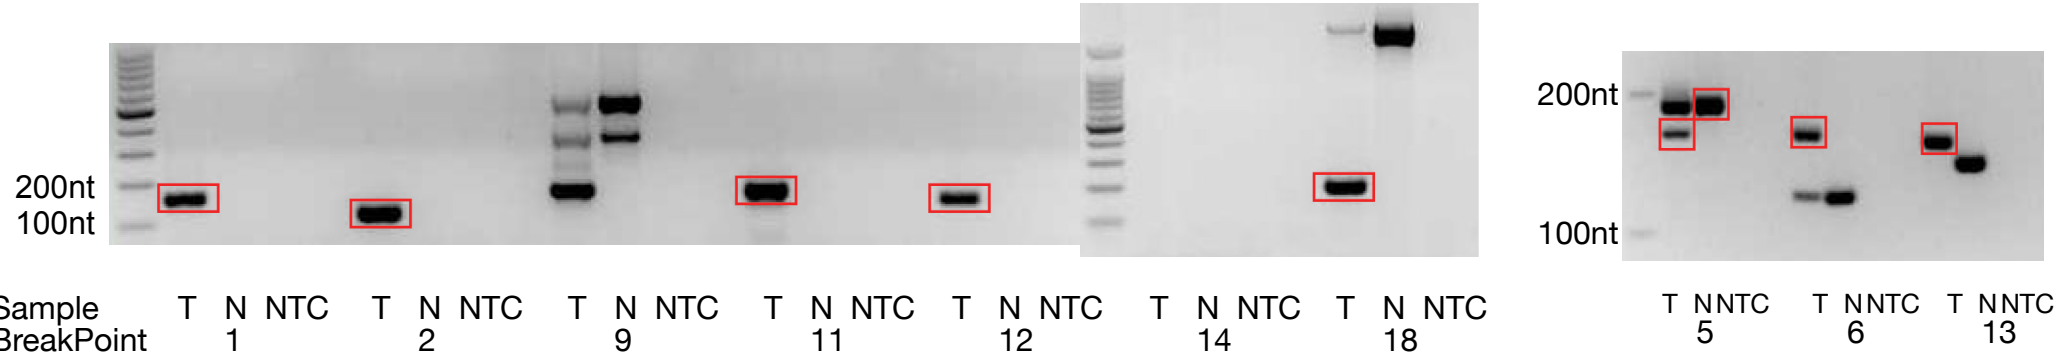**(B)**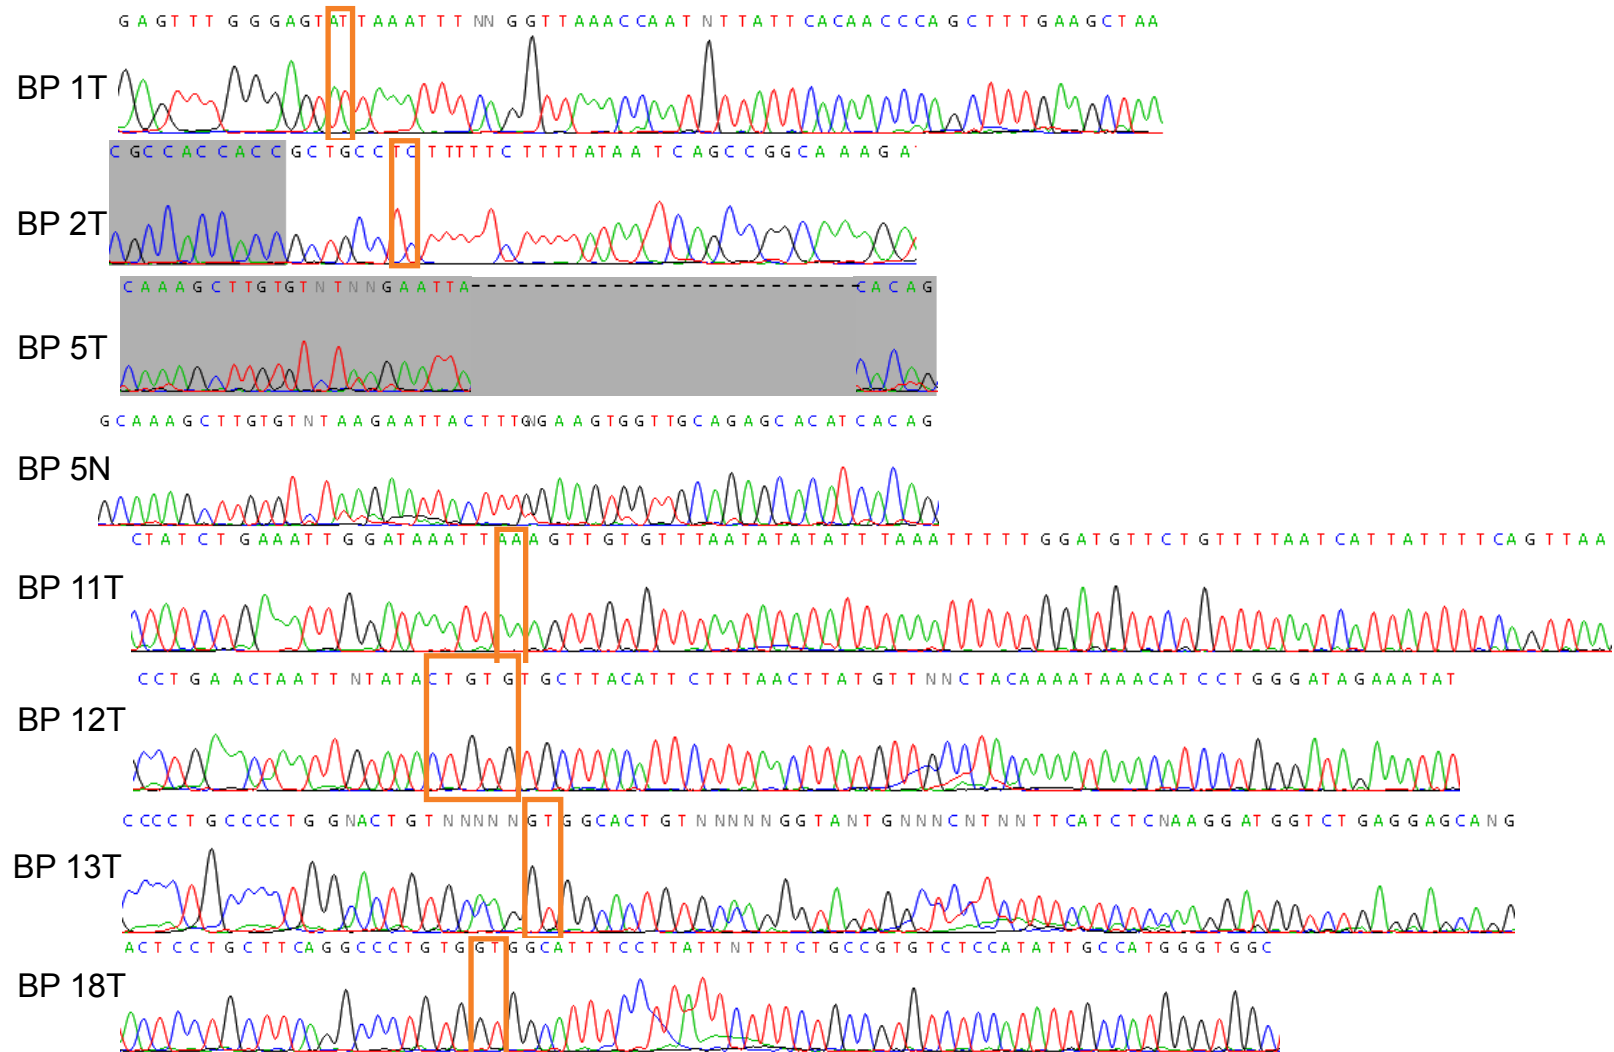

Supplement: supp_btt767_SuppFigure9_20130712_Breakpoint_gels_with_sequencing.pdf [file supp_btt767_SuppFigure9_20130712_Breakpoint_gels_with_sequencing.pdf]
